# Supplementary material
Source: Springer Nature journal article supplement (https://www.springermedizin.de/resource/supplementary/12961_2012_264_MOESM6_ESM.pdf/9570920)

# Total TB Incidence and Treatment Cost

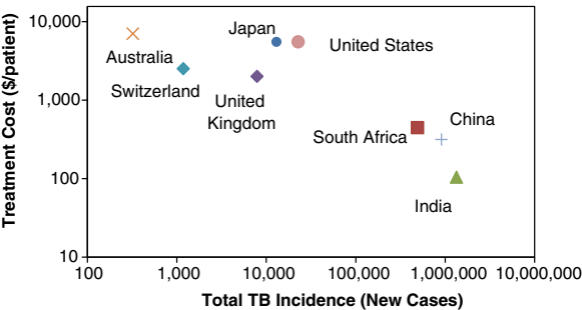

Supplement: MOESM6 [file 9570920]
